# Supplementary material for: Age-Related Shifts in Housing and Transportation Demand : A Multidisciplinary Study Conducted for Metro by Portland State University's College of Urban and Public Affairs, Final Report
Source: Royal Society of Chemistry journal article supplement (doi:10.1039/d2ra04241j), 2006-01-01
Supplement: d2ra04241j1.pdf [file d2ra04241j1.pdf]

## Electronic Supplementary Material (ESI) for RSC Advances

# Raman mapping of piezoelectric poly (L-Lactic acid) films for force sensors

*Ivan S. Babichuk<sup>a,b,†</sup>, Chubin Lin<sup>a,†</sup>, Yuhui Qiu<sup>a</sup>, Huiyu Zhu<sup>a</sup>, Terry Tao Ye<sup>c,\*</sup>, Zhaoli Gao<sup>d,e,\*</sup>, Jian Yang<sup>a,\*</sup>*

<sup>a</sup> Faculty of Intelligent Manufacturing, Wuyi University, 529020 Jiangmen, P.R. China

<sup>b</sup> V. Lashkaryov Institute of Semiconductor Physics, NAS of Ukraine, 03680 Kyiv, Ukraine

<sup>c</sup> Department of Electrical and Electronic Engineering and University Key Laboratory of Advanced Wireless Communications of Guangdong Province, Southern University of Science and Technology, 518055, Shenzhen, P.R. China

<sup>d</sup> Biomedical Engineering Department, The Chinese University of Hong Kong, Shatin, New Territories, Hong Kong, P.R. China

<sup>e</sup> CUHK Shenzhen Research Institute, Nanshan, 518060, Shenzhen, P.R. China

\* Corresponding authors:

*E-mail addresses:* [jjiany@szu.edu.cn](mailto:jjiany@szu.edu.cn) (Jian Yang), [yet@sustech.edu.cn](mailto:yet@sustech.edu.cn), [zlgao@cuhk.edu.hk](mailto:zlgao@cuhk.edu.hk).

<sup>†</sup> Authors contributed equally to this work: I.S. Babichuk and Chubin Lin

**Table S1** Wavenumber of PLLA films obtained at the varied time treatment

| Raman (cm <sup>-1</sup> ) |      |      |         | ATR-FTIR (cm <sup>-1</sup> ) |        |      |      | Ref. [Kister]                                     |
|---------------------------|------|------|---------|------------------------------|--------|------|------|---------------------------------------------------|
| 0h                        | 3h   | 12h  | 24h     | 0h                           | 3h     | 12h  | 24h  | Assignment                                        |
| 2948                      | 2949 | 2948 | 2948 W* | 2952 VS*                     | 2952   | 2952 | 2952 | $\nu_s\text{CH}_3$                                |
| -                         | -    | -    | -       | 2922 VS                      | 2924   | 2922 | 2923 | $\nu_{as}\text{CH}_3$                             |
| 2878                      | 2878 | 2878 | 2878 M* | 2864 VS                      | 2868   | 2864 | 2866 | $\nu\text{CH}$                                    |
| -                         | -    | -    | -       | 2361 M                       | 2361   | 2361 | 2361 | -                                                 |
| -                         | -    | -    | -       | 2337 M                       | 2337   | 2337 | 2337 | -                                                 |
| 1776                      | 1777 | 1777 | 1777 S* | -                            | -      | -    | -    | $\nu(\text{C}=\text{O})$                          |
| 1766                      | 1765 | 1765 | 1765 S  | -                            | -      | -    | -    | $\nu(\text{C}=\text{O})$                          |
| 1749                      | 1749 | 1749 | 1749 M  | 1747 S                       | 1724   | 1747 | 1749 | $\nu(\text{C}=\text{O})$                          |
| -                         | -    | -    | -       | 1649 W                       | 1649   | 1649 | 1649 | $\nu(\text{C}=\text{C})$                          |
| 1455                      | 1454 | 1453 | 1455 S  | 1454 S                       | 1452   | 1454 | 1453 | $\delta_{as}\text{CH}_3$                          |
| 1388                      | 1389 | 1388 | 1389 M  | -                            | -      | -    | -    | $\delta_s\text{CH}_3$                             |
| -                         | -    | -    | -       | 1379 M                       | 1377   | 1377 | 1377 | $\delta_1\text{CH} + \delta_s\text{CH}_3$         |
| 1365                      | 1364 | 1365 | 1365 M  | 1361 M                       | -      | 1361 | 1361 | $\delta_1\text{CH} + \delta_s\text{CH}_3$         |
| 1346                      | 1346 | 1346 | 1346 M  | -                            | -      | -    | -    | $\delta_s\text{CH}_3$                             |
| 1315                      | 1312 | 1312 | 1312    | -                            | -      | -    | -    | $\delta_2\text{CH}$                               |
| 1303                      | 1302 | 1303 | 1303    | -                            | -      | -    | -    | $\delta_2\text{CH}$                               |
| 1294                      | 1294 | 1294 | 1294 M  | 1299 W                       | 1310   | 1299 | 1299 | $\delta_2\text{CH}$                               |
| -                         | -    | -    | 1218 W  | -                            | 1236 S | -    | -    | $\nu_{as}\text{COC}$                              |
| -                         | -    | -    | -       | 1205 W                       | -      | 1205 | 1205 | $\nu(\text{C}-\text{OH})$                         |
| 1182                      | 1182 | 1182 | 1182 W  | 1182 M                       | -      | 1182 | 1182 | $\nu_{as}\text{COC}$                              |
| -                         | -    | -    | -       | -                            | 1171   | -    | -    | $\delta\text{CH}_3$                               |
| 1130                      | 1131 | 1129 | 1130 S  | 1128 M                       | 1120   | 1128 | 1128 | $r_{as}\text{CH}_3$                               |
| 1094                      | 1094 | 1093 | 1093 M  | -                            | -      | -    | -    | $\nu_s\text{COC}$                                 |
| -                         | -    | -    | -       | 1081 S                       | -      | 1081 | 1081 | $\nu(\text{C}-\text{OH})$                         |
| -                         | -    | -    | -       | -                            | 1059   | -    | -    | $\nu\text{COC}$                                   |
| 1044                      | 1044 | 1043 | 1044 S  | 1041 M                       | 1036   | 1041 | 1041 | $\nu\text{C}-\text{CH}_3$                         |
| -                         | -    | -    | -       | -                            | 974    | -    | -    | $\delta(\text{C}-\text{H})$ deformation           |
| 924                       | 924  | 924  | 924 W   | -                            | -      | -    | -    | $r\text{CH}_3 + \nu\text{C}-\text{C}$             |
| -                         | -    | -    | -       | 910 W                        | 905    | 918  | 918  | $\nu_s\text{COC}$                                 |
| -                         | -    | -    | -       | -                            | 891    | -    | -    | $\delta(\text{C}-\text{H})$ deformation           |
| 875                       | 875  | 875  | 875 VS  | -                            | -      | -    | -    | $\nu\text{C}-\text{COO}$                          |
| -                         | -    | -    | -       | -                            | 827    | -    | -    | $\delta(\text{C}-\text{H})$ deformation           |
| 737                       | 737  | 737  | 737 M   | 754 W                        | 754    | 754  | 754  | $\delta\text{C}=\text{O}$                         |
| 710                       | 713  | 713  | 713 M   | -                            | -      | -    | -    | $\gamma\text{C}=\text{O}$                         |
| -                         | -    | 679  | 679 W   | 689 W                        | 698    | 689  | 689  | $\gamma\text{C}=\text{O}$                         |
| -                         | -    | 577  | 579 W   | -                            | -      | -    | -    | $\delta_1\text{C}-\text{CH}_3 + \delta\text{CCO}$ |
| -                         | 515  | 515  | 515 W   | -                            | -      | -    | -    | $\delta_1\text{C}-\text{CH}_3 + \delta\text{CCO}$ |
| 413                       | 413  | 413  | 413 VS  | -                            | -      | -    | -    | $\delta\text{CCO}$                                |
| 398                       | 398  | 398  | 398 VS  | -                            | -      | -    | -    | $\delta\text{CCO}$                                |
| 347                       | 347  | 347  | 347 W   | -                            | -      | -    | -    | $\delta_2\text{C}-\text{CH}_3 + \delta\text{COC}$ |
| 305                       | 308  | 307  | 306 S   | -                            | -      | -    | -    | $\delta_s\text{C}-\text{CH}_3 + \delta\text{COC}$ |
| 239                       | 240  | -    | 241 W   | -                            | -      | -    | -    | $\tau\text{CC}$                                   |
| 206                       | 207  | 207  | 206 S   | -                            | -      | -    | -    | $\tau\text{CC}$                                   |
| 159                       | 159  | 159  | 159 S   | -                            | -      | -    | -    | Skeletal torsion                                  |
| 116                       | 116  | 116  | 116 S   | -                            | -      | -    | -    | Skeletal torsion                                  |

\*VS – very strong intensity, S – strong, M – medium, W – weak, s – symmetric, as – asymmetric

## Reference

G. Kister, G. Cassanas, M. Vert, B. Pauvert and A. Térol. Vibrational analysis of poly(L-lactic acid). *J. Raman Spectrosc.*, 1995, **26**, 307-311. DOI: 10.1002/jrs.1250260409.
